# Supplementary material
Source: PubMed Central journal article supplement (PMC149824)
Supplement: nar_31_5_1497_v2_1.pdf [file nar_31_5_1497_v2_1.pdf]

## SUPPLEMENTARY MATERIAL

**Table S1. Raw binding data for 50 NF- $\kappa$ B binding motif used in the study.** Raw data and the geometric mean of two independent measurements. The data for p52p52 are from 8 gels, normalised by scaling the observed PhosphorImager signals by the signal of the control sequence GGGGTCCCC (assigned with the value of 1000). The data for p50p50 are experimental values from (4), normalised to the value 1000 for GGGGTCCCC motif.

| sites      | p52p52 |      |             | p50p50 |      |             |
|------------|--------|------|-------------|--------|------|-------------|
|            | exp1   | exp2 | GM          | exp1   | exp2 | GM          |
| GGAAATTTCC | 19     | 149  | <b>54</b>   | 62     | 12   | <b>27</b>   |
| GGAACCTCCC | 25     | 12   | <b>17</b>   | 10     | 7    | <b>9</b>    |
| GGAACGCCCC | 23     | 19   | <b>21</b>   | 23     | 26   | <b>24</b>   |
| GGAACGTCCC | 120    | 66   | <b>89</b>   | 15     | 15   | <b>15</b>   |
| GGAACTTTCC | 11     | 77   | <b>28</b>   | 13     | 8    | <b>10</b>   |
| GGAAGCTTCC | 12     | 13   | <b>13</b>   | 13     | 10   | <b>12</b>   |
| GGAAGGCCCC | 46     | 28   | <b>36</b>   | 29     | 39   | <b>34</b>   |
| GGAAGGCTCC | 5      | 6    | <b>5</b>    | 10     | 4    | <b>7</b>    |
| GGAAGTTTCC | 5      | 72   | <b>19</b>   | 13     | 9    | <b>11</b>   |
| GGAATACCCC | 418    | 374  | <b>396</b>  | 150    | 261  | <b>198</b>  |
| GGAATATTCC | 6      | 10   | <b>7</b>    | 6      | 5    | <b>6</b>    |
| GGAATTCTCC | 23     | 14   | <b>18</b>   | 13     | 13   | <b>13</b>   |
| GGAGAACCCC | 38     | 50   | <b>44</b>   | 76     | 179  | <b>117</b>  |
| GGAGACTTCC | 11     | 22   | <b>16</b>   | 10     | 4    | <b>6</b>    |
| GGAGCGCCCC | 129    | 154  | <b>141</b>  | 17     | 35   | <b>24</b>   |
| GGAGGATCCC | 12     | 5    | <b>8</b>    | 21     | 16   | <b>18</b>   |
| GGAGGCCTCC | 14     | 12   | <b>13</b>   | 9      | 4    | <b>6</b>    |
| GGAGGCTCCC | 12     | 46   | <b>24</b>   | 9      | 6    | <b>7</b>    |
| GGAGGGTTCC | 24     | 19   | <b>21</b>   | 35     | 40   | <b>38</b>   |
| GGGAAATTCC | 713    | 1168 | <b>912</b>  | 1128   | 563  | <b>797</b>  |
| GGGAACCTCC | 155    | 96   | <b>122</b>  | 211    | 198  | <b>205</b>  |
| GGGAATTTCC | 1419   | 502  | <b>844</b>  | 1480   | 595  | <b>939</b>  |
| GGGACTCTCC | 104    | 101  | <b>103</b>  | 115    | 127  | <b>121</b>  |
| GGGAGACTCC | 10     | 21   | <b>14</b>   | 10     | 7    | <b>8</b>    |
| GGGAGCTCCC | 14     | 32   | <b>21</b>   | 20     | 25   | <b>22</b>   |
| GGGAGGCCCC | 28     | 27   | <b>27</b>   | 101    | 154  | <b>125</b>  |
| GGGAGTCTCC | 13     | 26   | <b>18</b>   | 22     | 10   | <b>15</b>   |
| GGGATACCCC | 186    | 404  | <b>274</b>  | 205    | 375  | <b>278</b>  |
| GGGATATCCC | 138    | 288  | <b>199</b>  | 155    | 221  | <b>185</b>  |
| GGGATCCTCC | 13     | 9    | <b>10</b>   | 11     | 11   | <b>11</b>   |
| GGGATCTCCC | 180    | 535  | <b>310</b>  | 380    | 659  | <b>501</b>  |
| GGGATGTCCC | 185    | 484  | <b>299</b>  | 281    | 202  | <b>238</b>  |
| GGGGAATCCC | 2323   | 1926 | <b>2116</b> | 2828   | 1157 | <b>1809</b> |
| GGGGACCCCC | 141    | 342  | <b>220</b>  | 261    | 234  | <b>247</b>  |
| GGGGACTTCC | 1301   | 972  | <b>1125</b> | 859    | 465  | <b>632</b>  |
| GGGGAGCCCC | 138    | 78   | <b>104</b>  | 216    | 289  | <b>250</b>  |
| GGGGAGTCCC | 357    | 627  | <b>473</b>  | 654    | 285  | <b>432</b>  |
| GGGGATTCCC | 2267   | 3786 | <b>2929</b> | 4405   | 1127 | <b>2229</b> |
| GGGGCACCCC | 20     | 30   | <b>24</b>   | 110    | 168  | <b>136</b>  |
| GGGGCCCCCC | 47     | 33   | <b>39</b>   | 127    | 135  | <b>131</b>  |
| GGGGCTCCCC | 84     | 196  | <b>128</b>  | 174    | 263  | <b>214</b>  |
| GGGGCTTCCC | 1059   | 1217 | <b>1135</b> | 1425   | 1053 | <b>1225</b> |
| GGGGGATTCC | 952    | 930  | <b>941</b>  | 1291   | 708  | <b>956</b>  |
| GGGGGCCCCC | 103    | 57   | <b>76</b>   | 109    | 134  | <b>121</b>  |
| GGGGGCTCCC | 68     | 46   | <b>56</b>   | 307    | 459  | <b>375</b>  |
| GGGGGGCTCC | 28     | 21   | <b>24</b>   | 66     | 112  | <b>86</b>   |
| GGGGTACTCC | 12     | 99   | <b>34</b>   | 23     | 23   | <b>23</b>   |
| GGGGTATCCC | 323    | 191  | <b>248</b>  | 132    | 236  | <b>177</b>  |
| GGGGTGCTCC | 14     | 140  | <b>43</b>   | 14     | 30   | <b>21</b>   |
| GGGGTCCCC  | 1000   | 1000 | <b>1000</b> | 1000   | 1000 | <b>1000</b> |

**Table S2. Predicted p52p52 binding affinity ranks for all 256 variants of the GRRNYYCC nucleotide sequence.** Complementary sequences are assigned adjacent ranks that differ by 1/256.

| sites      | p52p52 | sites      | p52p52 | sites       | p52p52 | sites      | p52p52 |
|------------|--------|------------|--------|-------------|--------|------------|--------|
| GGAAAACCCC | 0.9414 | GGAGAACCCC | 0.6211 | GGGAAAACCCC | 0.9219 | GGGGAACCCC | 0.8906 |
| GGAAAATCCC | 0.5781 | GGAGAACTCC | 0.375  | GGGAAACTCC  | 0.582  | GGGGAACTCC | 0.707  |
| GGAAAATCCC | 0.7227 | GGAGAATCCC | 0.3984 | GGGAAATCCC  | 0.8789 | GGGGAATCCC | 0.9883 |
| GGAAAATCCC | 0.4453 | GGAGAATCCC | 0.4414 | GGGAAATCCC  | 0.9336 | GGGGAATCCC | 0.9609 |
| GGAAACCCCC | 0.8438 | GGAGACCCCC | 0.3555 | GGGAACCCCC  | 0.7969 | GGGGACCCCC | 0.7422 |
| GGAAACCTCC | 0.1289 | GGAGACCTCC | 0.0469 | GGGAACCTCC  | 0.2227 | GGGGACCTCC | 0.5195 |
| GGAAACTCCC | 0.4336 | GGAGACTCCC | 0.1211 | GGGAACTCCC  | 0.6953 | GGGGACTCCC | 0.8242 |
| GGAAACTTCC | 0.2305 | GGAGACTTCC | 0.2539 | GGGAACTTCC  | 0.7109 | GGGGACTTCC | 0.9141 |
| GGAAAGCCCC | 0.7773 | GGAGAGCCCC | 0.5273 | GGGAAGCCCC  | 0.8516 | GGGGAGCCCC | 0.8203 |
| GGAAAGCTCC | 0.1484 | GGAGAGCTCC | 0.1719 | GGGAAGCTCC  | 0.4141 | GGGGAGCTCC | 0.4883 |
| GGAAAGTCCC | 0.5469 | GGAGAGTCCC | 0.332  | GGGAAGTCCC  | 0.8359 | GGGGAGTCCC | 0.9531 |
| GGAAAGTTCC | 0.2461 | GGAGAGTTCC | 0.2852 | GGGAAGTTCC  | 0.6836 | GGGGAGTTCC | 0.8672 |
| GGAAATCCCC | 0.9805 | GGAGATCCCC | 0.6484 | GGGAATCCCC  | 0.9961 | GGGGATCCCC | 0.8984 |
| GGAAATCTCC | 0.4727 | GGAGATCTCC | 0.2383 | GGGAATCTCC  | 0.6602 | GGGGATCTCC | 0.6523 |
| GGAAATTCCC | 0.9297 | GGAGATTCCC | 0.6562 | GGGAATTCCC  | 0.9648 | GGGGATTCCC | 0.9922 |
| GGAAATTCCC | 0.5312 | GGAGATTCCC | 0.4688 | GGGAATTCCC  | 0.9258 | GGGGATTCCC | 0.9766 |
| GGAACACCCC | 0.7734 | GGAGCACCCC | 0.293  | GGGACACCCC  | 0.7891 | GGGGCACCCC | 0.5586 |
| GGAACACTCC | 0.2656 | GGAGCACTCC | 0.1445 | GGGCACTCC   | 0.3008 | GGGGCACTCC | 0.4648 |
| GGAACATCCC | 0.4805 | GGAGCATCCC | 0.1641 | GGGACATCCC  | 0.6914 | GGGGCATCCC | 0.7266 |
| GGAACATTCC | 0.2109 | GGAGCATTCC | 0.1914 | GGGACATTCC  | 0.6641 | GGGGCATTCC | 0.8555 |
| GGAACCCCCC | 0.6055 | GGAGCCCCCC | 0.1602 | GGGACCCCCC  | 0.625  | GGGGCCCCCC | 0.3789 |
| GGAACCTTCC | 0.0742 | GGAGCCCTCC | 0.0273 | GGGACCTTCC  | 0.0977 | GGGGCCCTCC | 0.3086 |
| GGAACCTCCC | 0.3242 | GGAGCCTCCC | 0.0898 | GGGACCTCCC  | 0.5039 | GGGGCCTCCC | 0.4219 |
| GGAACCTTCC | 0.0664 | GGAGCCTTCC | 0.0078 | GGGACCTTCC  | 0.4023 | GGGGCCTTCC | 0.5703 |
| GGAACGCCCC | 0.7617 | GGAGCGCCCC | 0.3164 | GGGACGCCCC  | 0.7539 | GGGGCGCCCC | 0.5352 |
| GGAACGCTCC | 0.1836 | GGAGCGCTCC | 0.1172 | GGGACGCTCC  | 0.2617 | GGGGCGCTCC | 0.3125 |
| GGAACGTCCC | 0.4531 | GGAGCGTCCC | 0.2578 | GGGACGTCCC  | 0.6133 | GGGGCGTCCC | 0.75   |
| GGAACGTCCC | 0.2266 | GGAGCGTCCC | 0.1797 | GGGACGTCCC  | 0.457  | GGGGCGTCCC | 0.7578 |
| GGAATCCCCC | 0.8711 | GGAGTCCCCC | 0.4844 | GGGACTCCCC  | 0.9492 | GGGGTCCCCC | 0.8164 |
| GGAATCTTCC | 0.2812 | GGAGTCTTCC | 0.1758 | GGGACTCTTCC | 0.3281 | GGGGTCTTCC | 0.5234 |
| GGAATTTCCC | 0.6797 | GGAGTTCCC  | 0.4102 | GGGACTTTCC  | 0.832  | GGGGTTCCC  | 0.8477 |
| GGAATTTTCC | 0.2422 | GGAGTTTCC  | 0.1523 | GGGACTTTCC  | 0.5508 | GGGGTTTCC  | 0.7812 |
| GGAAGACCCC | 0.8125 | GGAGGACCCC | 0.2773 | GGGAGACCCC  | 0.6328 | GGGGGACCCC | 0.5898 |
| GGAAGACTCC | 0.1055 | GGAGGACTCC | 0.0586 | GGGAGACTCC  | 0.082  | GGGGGACTCC | 0.3906 |
| GGAAGATCCC | 0.3633 | GGAGGATCCC | 0.0352 | GGGAGATCCC  | 0.6445 | GGGGGATCCC | 0.6719 |
| GGAAGATTCC | 0.1094 | GGAGGATTCC | 0.2031 | GGGAGATTCC  | 0.5977 | GGGGGATTCC | 0.9062 |
| GGAAGCCCCC | 0.8047 | GGAGGCCCCC | 0.1953 | GGGAGCCCCC  | 0.5078 | GGGGGCCCCC | 0.418  |
| GGAAGCCTCC | 0.043  | GGAGGCCTCC | 0      | GGGAGCCTCC  | 0.0156 | GGGGGCCTCC | 0.1992 |
| GGAAGCTCCC | 0.3398 | GGAGGCTCCC | 0.0117 | GGGAGCTCCC  | 0.5547 | GGGGGCTCCC | 0.5117 |
| GGAAGCTTCC | 0.0195 | GGAGGCTTCC | 0.0391 | GGGAGCTTCC  | 0.3359 | GGGGGCTTCC | 0.8008 |
| GGAAGCCCCC | 0.5664 | GGAGGGCCCC | 0.3047 | GGGAGGCCCC  | 0.4258 | GGGGGGCCCC | 0.3828 |
| GGAAGCTTCC | 0.0039 | GGAGGGCTCC | 0.0234 | GGGAGGCTCC  | 0.0859 | GGGGGGCTCC | 0.1562 |
| GGAAGTCCC  | 0.4062 | GGAGGGTCCC | 0.0938 | GGGAGGTCCC  | 0.5    | GGGGGGTCCC | 0.6289 |
| GGAAGTTCC  | 0.0625 | GGAGGGTTCC | 0.0703 | GGGAGGTTCC  | 0.3203 | GGGGGGTTCC | 0.6094 |

|            |        |            |        |            |        |            |        |
|------------|--------|------------|--------|------------|--------|------------|--------|
| GGAAGTCCC  | 0.9102 | GGAGGTCCC  | 0.5156 | GGGAGTCCC  | 0.8281 | GGGGGTCCC  | 0.7461 |
| GGAAGTCTCC | 0.25   | GGAGGTCTCC | 0.0508 | GGGAGTCTCC | 0.125  | GGGGGTCTCC | 0.3516 |
| GGAAGTTCCC | 0.7148 | GGAGGTTCCC | 0.2188 | GGGAGTTCCC | 0.6992 | GGGGGTCCC  | 0.793  |
| GGAAGTTTCC | 0.2344 | GGAGGTTTCC | 0.1328 | GGGAGTTTCC | 0.4297 | GGGGGTTC   | 0.8398 |
| GGAATACCCC | 0.9727 | GGAGTACCCC | 0.5391 | GGGATACCCC | 0.8867 | GGGGTACCCC | 0.7656 |
| GGAATACTCC | 0.4961 | GGAGTACTCC | 0.3594 | GGGATACTCC | 0.3438 | GGGGTACTCC | 0.543  |
| GGAATATCCC | 0.7383 | GGAGTATCCC | 0.3477 | GGGATATCCC | 0.8633 | GGGGTATCCC | 0.8828 |
| GGAATATTCC | 0.1367 | GGAGTATTCC | 0.4922 | GGGATATTCC | 0.7344 | GGGGTATTCC | 0.9688 |
| GGAATCCCC  | 0.9023 | GGAGTCCCC  | 0.3867 | GGGATCCCC  | 0.6758 | GGGGTCCCC  | 0.5938 |
| GGAATCCTCC | 0.207  | GGAGTCCTCC | 0.0547 | GGGATCCTCC | 0.0312 | GGGGTCCTCC | 0.2734 |
| GGAATCTCCC | 0.6016 | GGAGTCTCCC | 0.0781 | GGGATCTCCC | 0.6406 | GGGGTCTCCC | 0.6367 |
| GGAATCTTCC | 0.1133 | GGAGTCTTCC | 0.1016 | GGGATCTTCC | 0.3672 | GGGGTCTTCC | 0.8086 |
| GGAATGCCCC | 0.8594 | GGAGTGCCCC | 0.4609 | GGGATGCCCC | 0.7305 | GGGGTGCCCC | 0.5625 |
| GGAATGCTCC | 0.1875 | GGAGTGCTCC | 0.1406 | GGGATGCTCC | 0.168  | GGGGTGCTCC | 0.2891 |
| GGAATGTCCC | 0.668  | GGAGTGTCCC | 0.2969 | GGGATGTCCC | 0.6875 | GGGGTGTCCC | 0.7852 |
| GGAATGTTCC | 0.2148 | GGAGTGTTCC | 0.2695 | GGGATGTTCC | 0.4766 | GGGGTGTTCC | 0.7695 |
| GGAATTCCCC | 0.957  | GGAGTTCCCC | 0.7031 | GGGATTCCCC | 0.9844 | GGGGTTCCCC | 0.8945 |
| GGAATTCTCC | 0.4375 | GGAGTTCTCC | 0.3711 | GGGATTCTCC | 0.3945 | GGGGTTCTCC | 0.6172 |
| GGAATTCCC  | 0.9375 | GGAGTTCCC  | 0.5859 | GGGATTCCC  | 0.875  | GGGGTTCCC  | 0.918  |
| GGAATTTCC  | 0.4492 | GGAGTTTCC  | 0.5742 | GGGATTTCC  | 0.7188 | GGGGTTTCC  | 0.9453 |
